# Supplementary material for: Collective oscillation in dense suspension of self-propelled chiral rods
Source: Royal Society of Chemistry journal article supplement (doi:10.1039/c9sm00159j), 2019-01-01
Supplement: c9sm00159j1.pdf [file c9sm00159j1.pdf]

## Electronic Supplementary Information (ESI): Collective oscillation in dense suspension of self-propelled chiral rods

Yan Liu,<sup>a</sup> Yuguang Yang,<sup>b</sup> Bo Li<sup>\*a</sup> and Xi-Qiao Feng<sup>a</sup>

<sup>a</sup> Institute of Biomechanics and Medical Engineering, AML, Department of  
Engineering Mechanics, Tsinghua University, Beijing 100084, China

<sup>b</sup> Chemical & Biomolecular Engineering, Johns Hopkins University, Baltimore,  
MD 21218

### Supplementary Figure

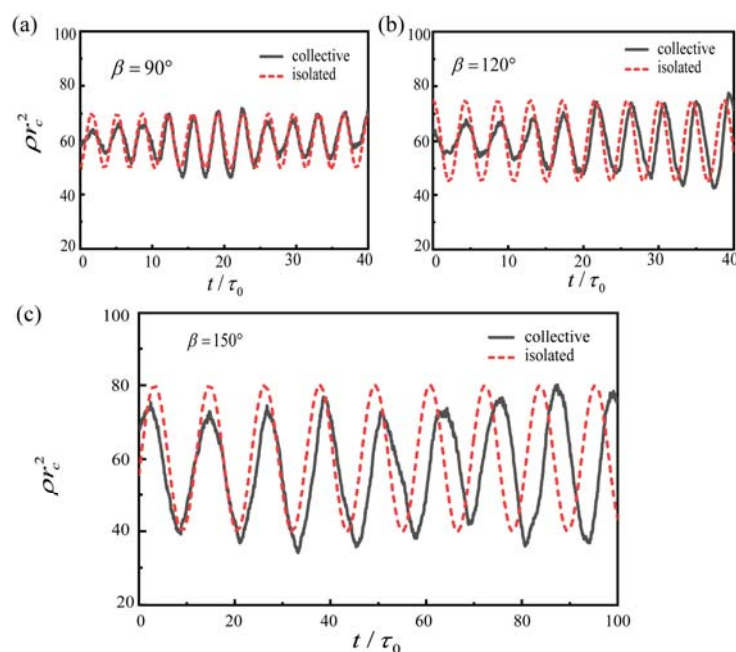

Fig. S1. Local number density as a function of time for various chiral rods with arm-length ratio  $\alpha = 3$  and (a)  $\beta = 90^\circ$ , (b)  $\beta = 120^\circ$ , (c)  $\beta = 150^\circ$ . The period of collective oscillation (black solid line) and isolated motion (red dotted line) are compared. Deviation are 1.3%, 4.2% and 9.7%, respectively. When  $\beta$  increases, the maximum magnitude of the local density increases, because alignment induced by

---

\* Corresponding author.

E-mail address: libome@tsinghua.edu.cn (B. Li).

elongated shape promotes more dense packing.

### **Supplementary Movies**

Supplementary Movie 1: **Simulation animation of the dynamics of chiral rods** ( $\beta = 90^\circ$ ). The animation of 4000 active chiral L-shaped rods under the self-propulsion and repulsive interaction. The aspect ratio is  $\alpha = 6/3$ . Other simulation parameters: active force magnitude  $F_a = 15kT/d$  and Yukawa amplitude  $U_0 = 25kT$ . The movie shows the formation of collective oscillation from initial random distribution.

Supplementary Movie 2: **Simulation animation of the dynamics of achiral rods** ( $\beta = 180^\circ$ ). The animation of 4000 active achiral straight rods under the self-propulsion and repulsive interaction. The system parameters are the same as Movie S1. The movie shows the formation of stable giant clusters from initial random distribution.

Supplementary Movie 3: **Contour of number density field in the chiral system** ( $\beta = 90^\circ$ ). The movie of contour of rod number density field in the chiral system corresponding to the case in Movie S1. There are 4000 L-shaped rods and the area fraction  $\phi = 20\%$ . The system at the beginning of the movie has reached the steady state. The color bar reflects the degree of intensity.

Supplementary Movie 4: **Contour of number density field in the achiral**

**system** ( $\beta = 180^\circ$ ). The movie of contour of rod number density field in the achiral system corresponding to the case in Movie S2. There are 4000 straight rods and the area fraction  $\phi = 20\%$ . The system at the beginning of the movie has reached the steady state. The color bar reflects the degree of intensity.
